# Supplementary material for: Electrochemiluminescence Imaging of Liposome Permeabilization by an Antimicrobial Peptide: Melittin
Source: PubMed Central journal article supplement — Chem Biomed Imaging. 2023 Mar 6;1(1):58–65. doi: 10.1021/cbmi.3c00003 (PMC11504585; doi:10.1021/cbmi.3c00003), 2023-03-06
Supplement: im3c00003_si_001.pdf [file im3c00003_si_001.pdf]

# Supporting Information

## Electrochemiluminescence Imaging of Liposome Permeabilization by an Antimicrobial Peptide: Melittin

Fatma Ben Trad,<sup>a</sup> Jérôme Delacotte,<sup>a</sup> Manon Guille-Collignon,<sup>a</sup> Frédéric Lemaître,<sup>a</sup> Stéphane Arbault,<sup>b</sup> Neso Sojic,<sup>c</sup> Fabienne Burlina,<sup>d\*</sup> Eric Labbé,<sup>a</sup> Olivier Buriez<sup>a\*</sup>

<sup>a</sup> PASTEUR, Département de Chimie, Ecole Normale Supérieure, PSL University, Sorbonne Université, CNRS, 75005 Paris, France.

<sup>b</sup> Univ. Bordeaux, CNRS, Bordeaux INP, CBMN, UMR 5248, F-33600 Pessac, France.

<sup>c</sup> Univ. Bordeaux, CNRS, Bordeaux INP, ISM, UMR 5255 CNRS, 33400 Talence, France.

<sup>d</sup> Sorbonne Université, Ecole Normale Supérieure, PSL University, CNRS, Laboratoire des Biomolécules (LBM), 75005 Paris, France

Corresponding authors email addresses:

Dr Fabienne Burlina: [fabienne.burlina@sorbonne-universite.fr](mailto:fabienne.burlina@sorbonne-universite.fr)

Dr Olivier Buriez : [olivier.buriez@ens.psl.eu](mailto:olivier.buriez@ens.psl.eu)

**A/ Parallel acquisition of ECL (top) and PL (below) images showing two successive permeation processes of a single liposome by melittin (10  $\mu$ M).**

(A)

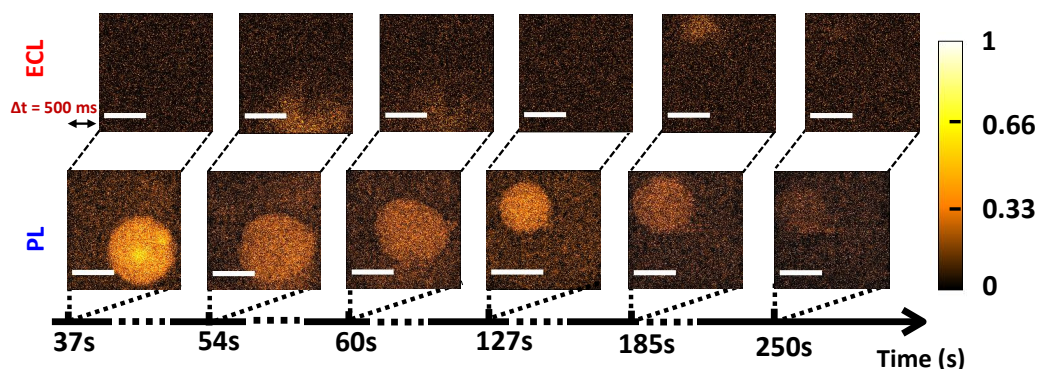

(B)

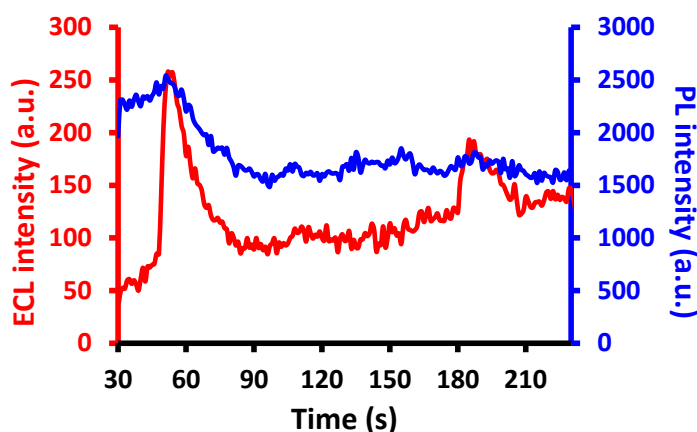

**Figure S1.** (A) Parallel time-lapse imaging by ECL (top) and PL (below) showing two successive permeation processes of a single liposome by 10  $\mu$ M melittin. In this case, the ROI is the entire image. Scale bar: 100  $\mu$ m. (B) Evolution of PL (blue curve) and ECL (red curve) intensity as a function of time for a single liposome [shown in (A)]. Same experimental conditions as in Figure 2.

### B/ Registration of both luminescent signals (ECL and PL)

Since both luminescent signals (ECL and PL) were registered with the same EMCCD camera all along the experiments, the diode ( $\lambda_{\text{ex}} = 455$  nm) was set in a flashing mode to better distinguish between ECL and PL signals. The images were registered continuously with a 4 frame per second acquisition rate corresponding to 4 Hz frequency. For each second, the first frame (i.e., #1, #5, #9, etc...) was kept as a PL image whereas the third one (i.e., #3, #7, etc...) was selected as an ECL image. The two other frames (e.g. #2 and #4 in the first second) were not selected to avoid any PL pollution on ECL images. This also explains the acquisition time difference of 500 ms between PL and ECL images. Note that the electrochemical polarization of the ITO electrode was applied all along the experiment. Accordingly, ECL and PL images

could be recorded separately then reassembled to build two series of ECL and PL images as a function of time

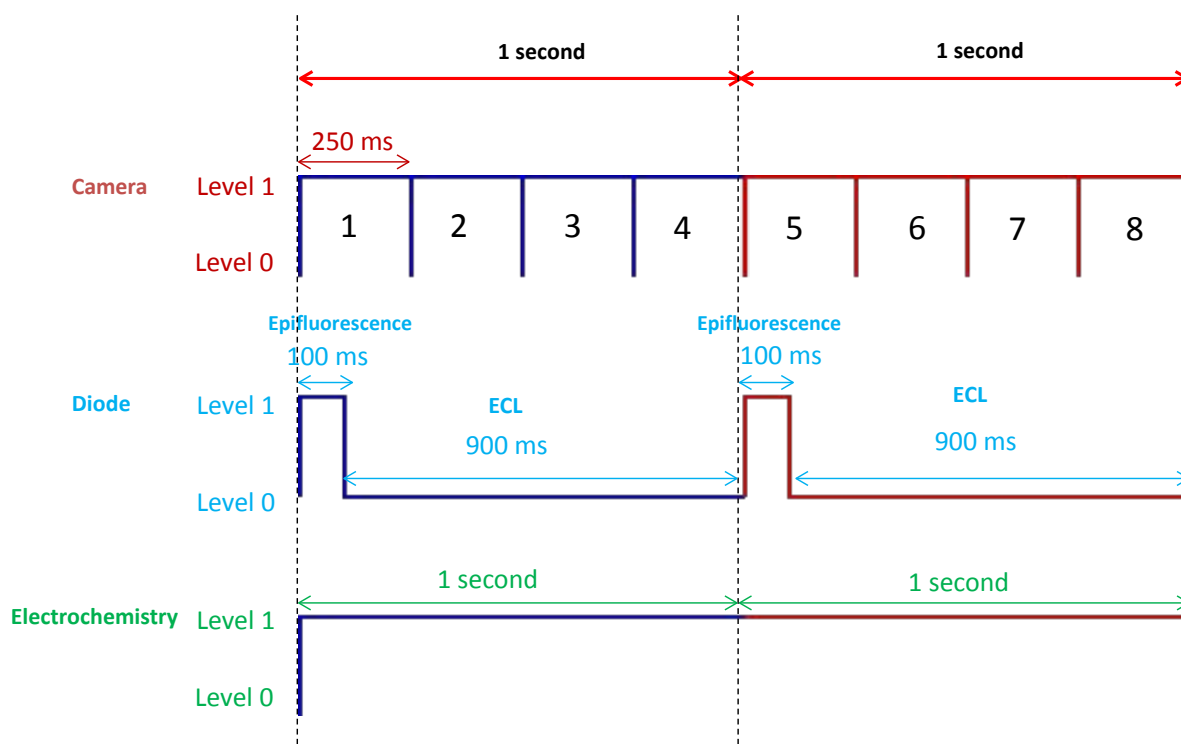

**Figure S2.** Appropriate time-sequences for the combined detection of amperometry-ECL-PL signals. Reprinted with permission from ref. 54. Copyright 2022 American Chemical Society.
